# Supplementary material for: Chemical Composition and Bioactive Properties of Commercial and Non-Commercial Purple and White Açaí Berries
Source: Preprints.org preprint supplement (doi:10.20944/preprints202009.0703.v1), 2020-09-29
Supplement: Supplementary file 3 [file supplementary]

**Table S1.** Total elemental levels (mean ± standard deviation) of essential trace elements (mg/kg fresh weight) of açaí pulp samples determined using ICP-MS: data relates to the type of sample (non-commercial : purple n= 6; and white n= 4; and commercial: purple n= 4; n is the number of samples).

|  | Samples | | | | | | |
| --- | --- | --- | --- | --- | --- | --- | --- |
| Non-commercial | | | | Commercial | | |
| Purple Açaí whole | Purple Açaí de-fatted | White Açaí whole | White Açaí de-fatted | Pulp SP | Powder SP | Powder UK |
| Ca | 468.82 ± 14.15 | 527.34 ± 58.07 | 416.23 ± 2.20 | 525.11 ± 13.28 | 165.04 ± 16.12 | 202.93 ± 17.25 | 66.17 ± 15.65 |
| Mg | 233.23 ± 2.16 | 272.36 ± 4.15 | 246.92 ± 12.13 | 301.77 ± 9.00 | 202.21 ± 2.75 | 203.69 ± 2.14 | 85.92 ± 1.13 |
| Mn | 64.06 ± 0.93 | 80.92 ± 0.77 | 61.14 ± 0.60 | 80.89 ± 1.57 | 26.76 ± 1.51 | 54.70 ± 1.78 | 1.62 ± 0.01 |
| Fe | 3.01 ± 0.00 | 4.17 ± 0.12 | 3.65 ± 0.75 | 4.30 ± 0.10 | 3.00 ± 0.04 | 2.19 ± 0.03 | 0.23 ± 0.01 |
| Zn | 2.49 ± 0.07 | 3.24 ± 0.17 | 2.65 ± 0.03 | 3.62 ± 0.17 | 2.70 ± 0.65 | 2.32 ± 0.31 | 1.27 ± 0.12 |
| Cu | 1.81 ± 0.03 | 2.22 ± 0.01 | 1.72 ± 0.06 | 2.50 ± 0.10 | 1.52 ± 0.05 | 1.50 ± 0.09 | 0.35 ± 0.02 |
